# Supplementary material for: CALML5 is a ZNF750- and TINCR-induced protein that binds stratifin to regulate epidermal differentiation
Source: PubMed Central journal article supplement — Genes Dev. 2015 Nov 1;29(21):2225–30. doi: 10.1101/gad.267708.115 (PMC4647556; doi:10.1101/gad.267708.115), 2015-11-01

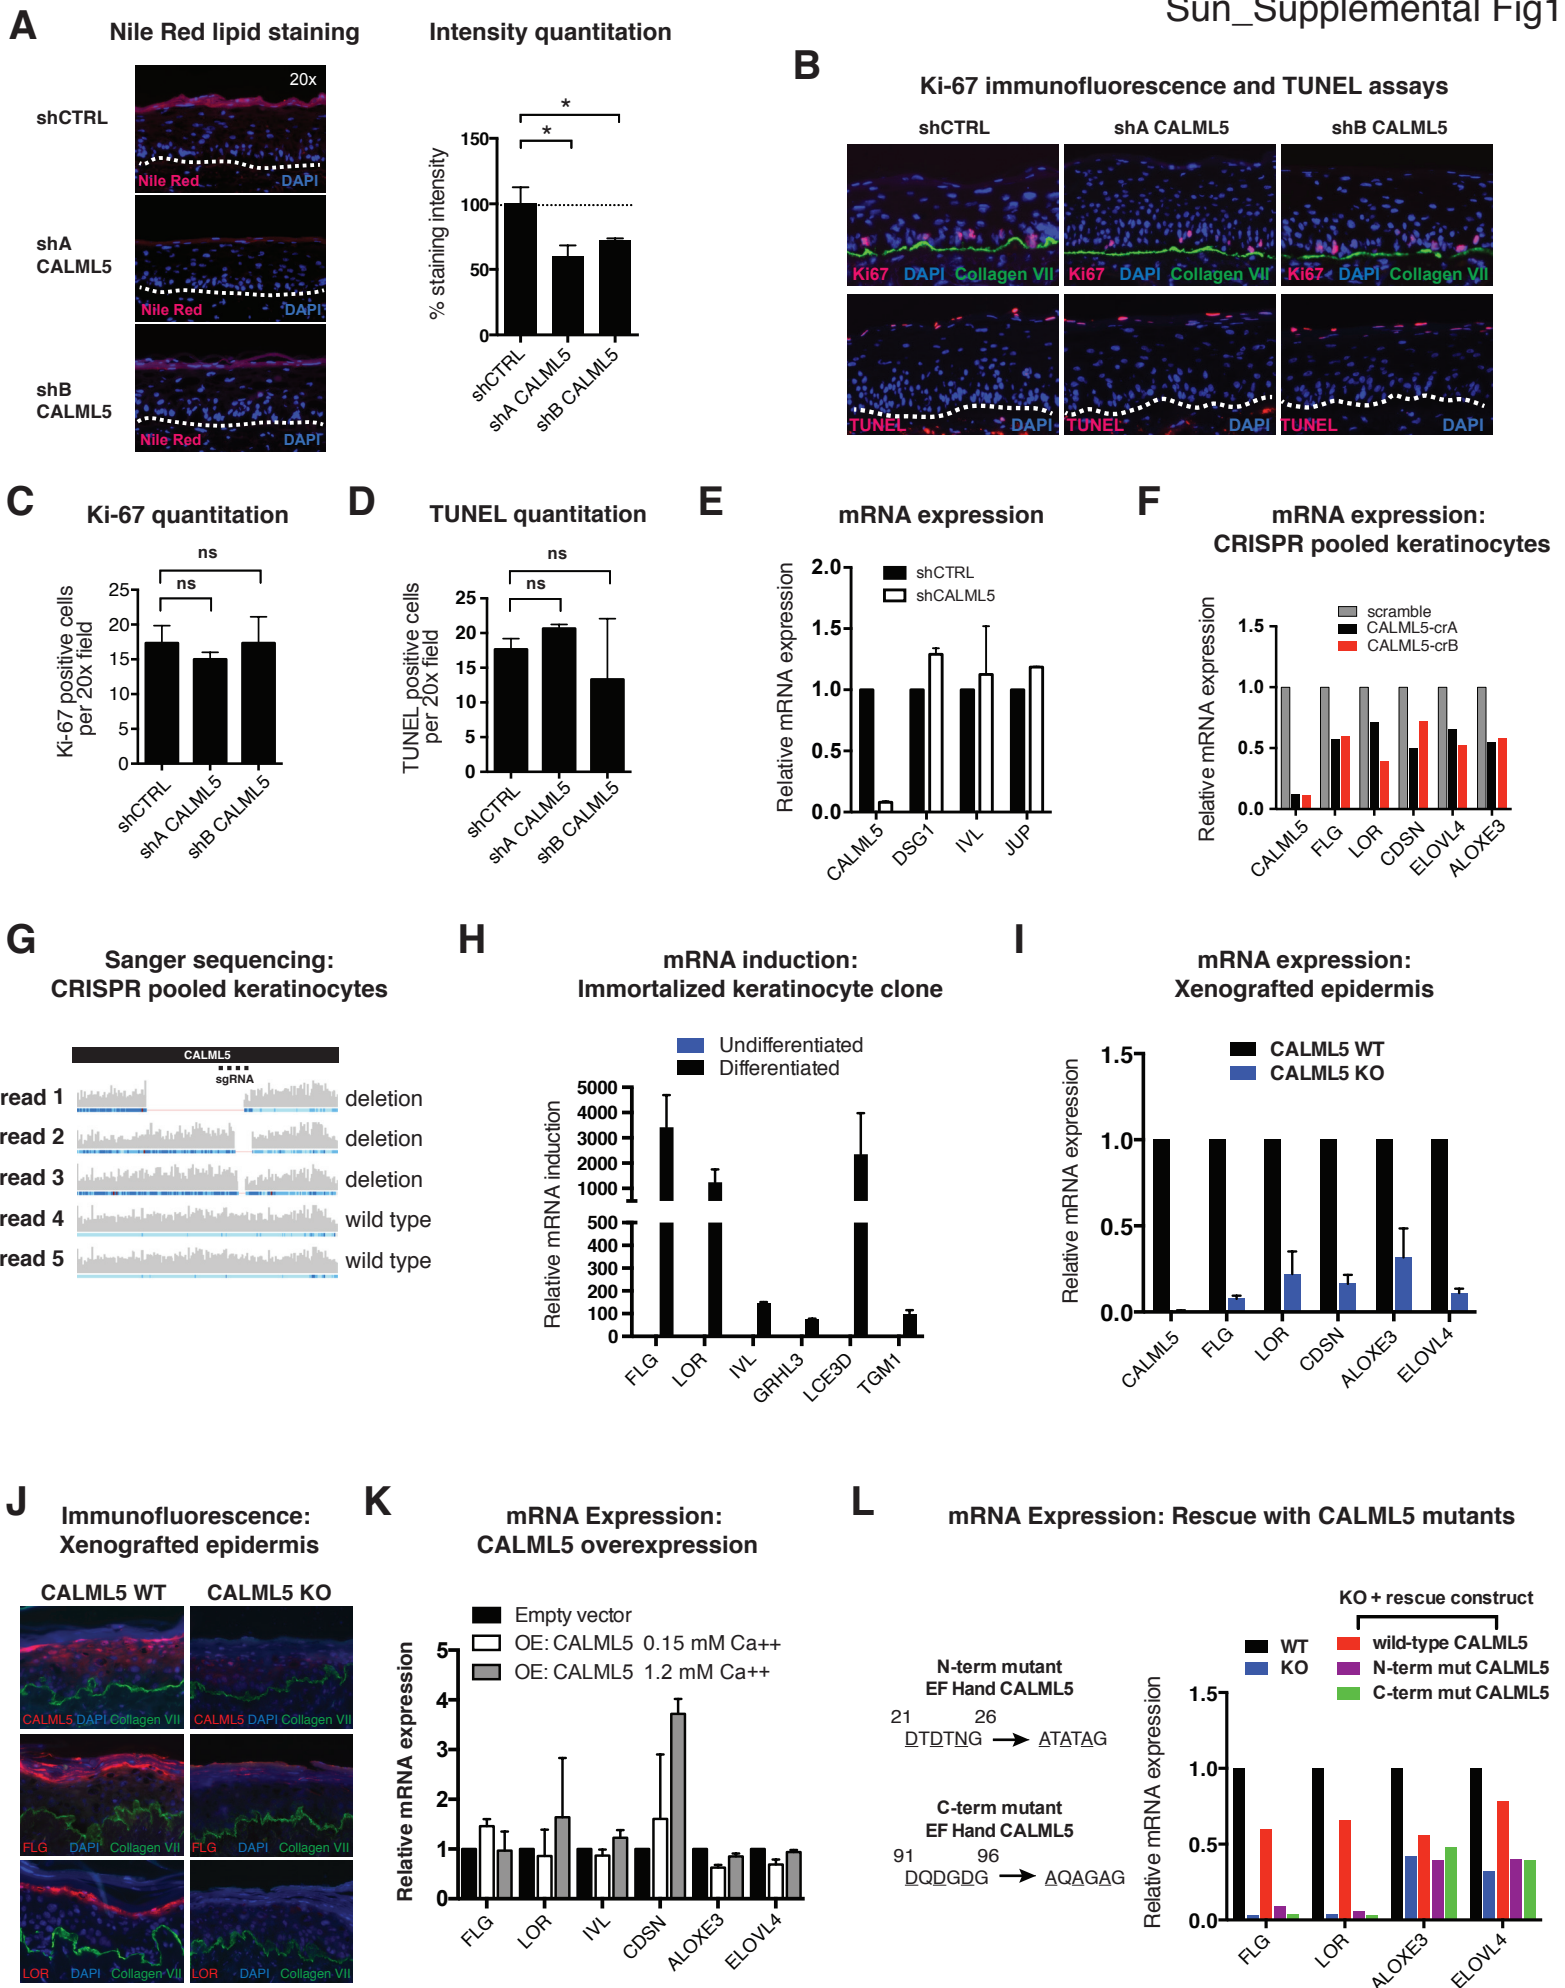

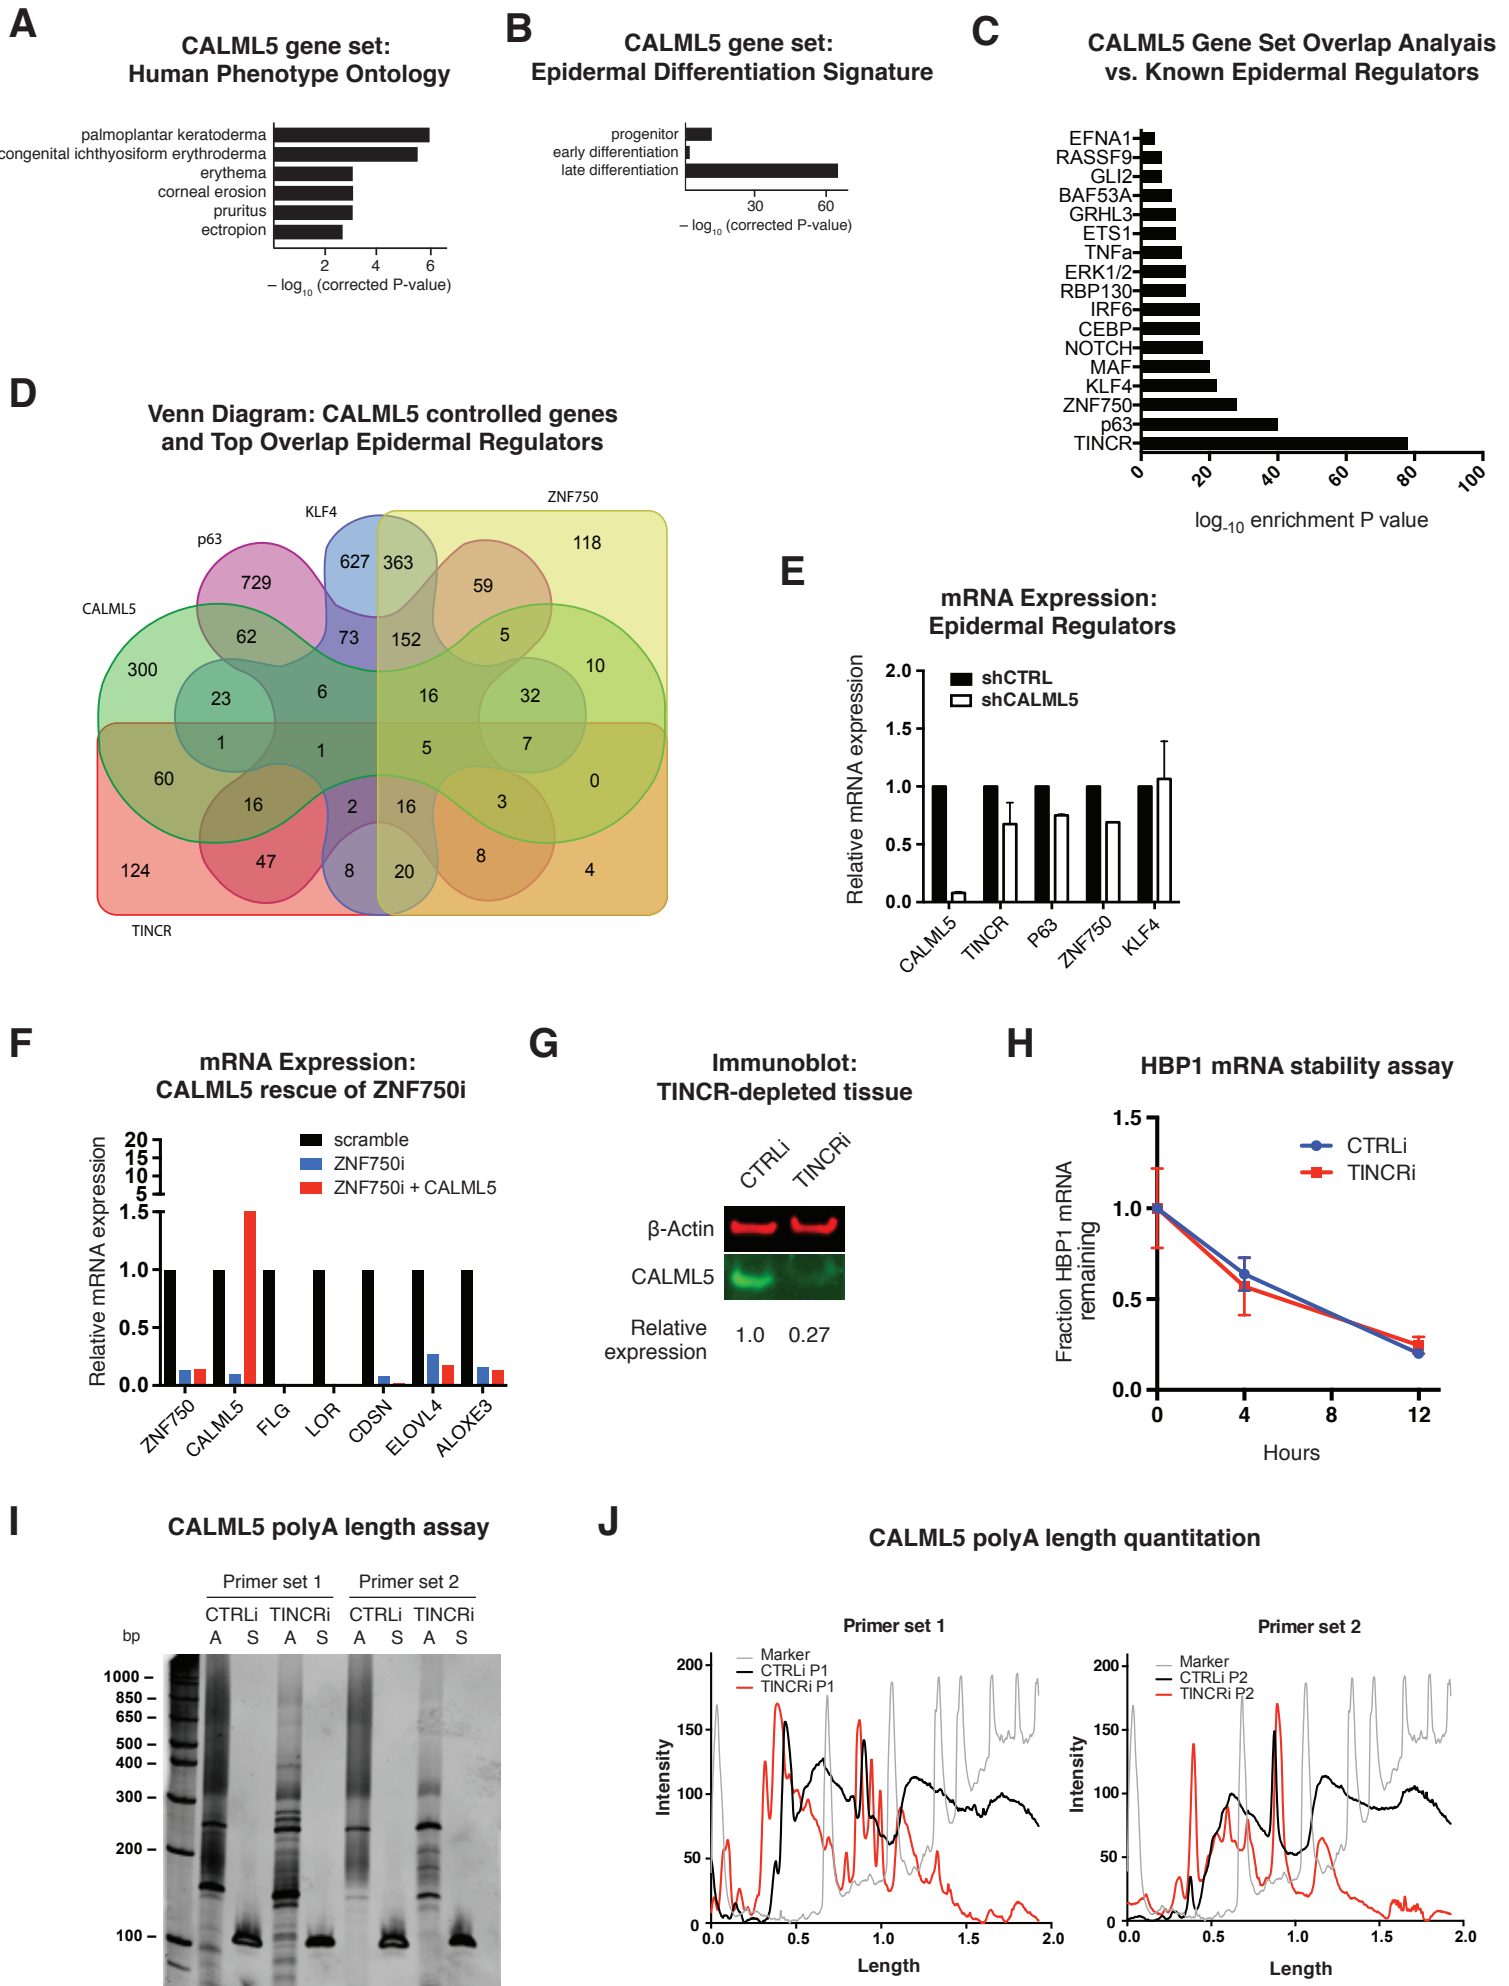

**A** Coomassie stain: Size fractionation of lysates from differentiated keratinocytes

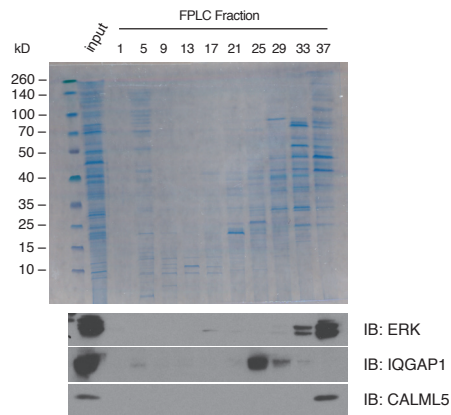

**B** Immunoblot: BirA proteins for BioID assay

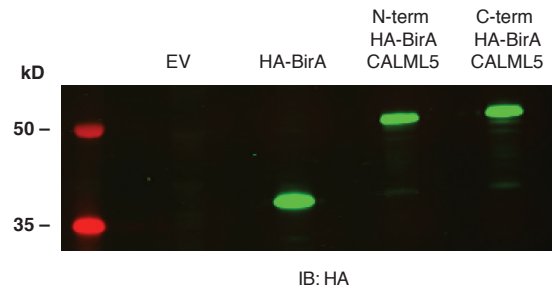

**C** Rescue assay with BirA fusion protein

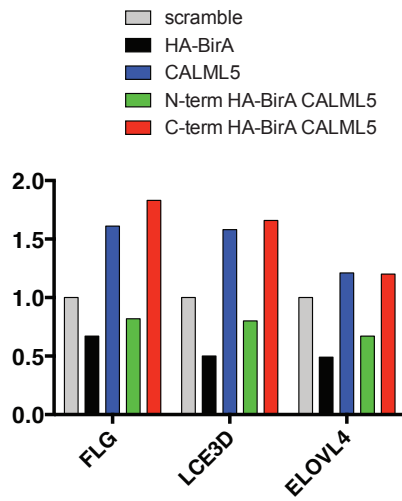

**A** Subcellular Fractionation and Immunoblot

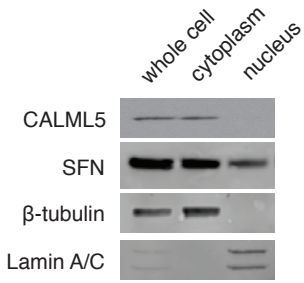

Differentiated Keratinocytes

**B** Far Western Blot

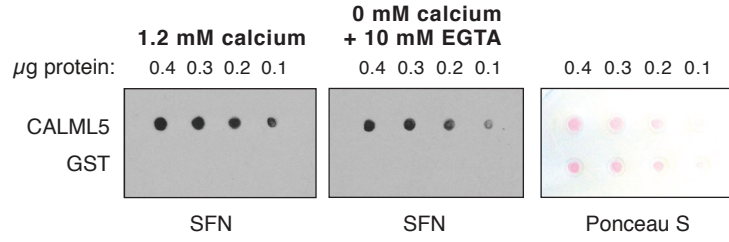

**C** Proximity Ligation Assay: CALML5 EF-Hand mutants and SFN

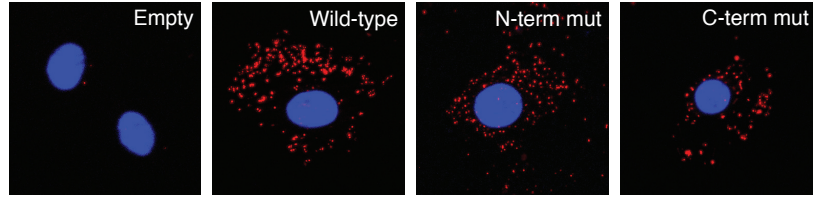

**D** PLA Quantitation

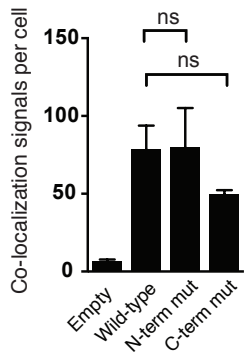

**E** Heatmap: SFN tissue depletion RNA-seq

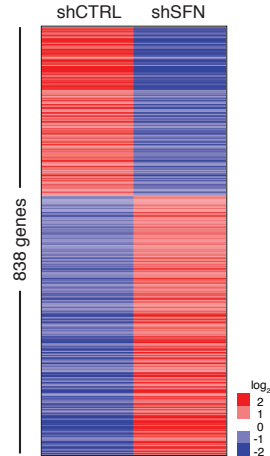

**F** SFN-controlled genes Epidermal Differentiation Signature

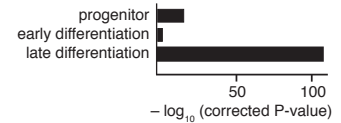

**G** CALML5-SFN co-controlled genes Epidermal Differentiation Signature

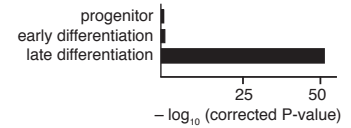

**H**

**CALML5-SFN Co-Controlled Late Epidermal Differentiation Genes**

|         |           |
|---------|-----------|
| AADACL2 | IMPA2     |
| ALOX12B | IRX3      |
| ANKRD35 | KRT1      |
| ARG1    | KRT2      |
| ASPRV1  | KRT9      |
| AZGP1   | LCE1E     |
| C5orf46 | LCE2B     |
| CASP14  | LOR       |
| CD36    | LYNX1     |
| CDSN    | NFATC2    |
| CKB     | PLA2G3    |
| CRISP3  | PLXDC2    |
| DAPL1   | PNPLA1    |
| DLX3    | PSAPL1    |
| ELMOD1  | PSORS1C2  |
| ENDOU   | PTGER3    |
| FAM3D   | SERPINA12 |
| FLG     | SGPP2     |
| FLG2    | SLC46A2   |
| FMO2    | SLURP1    |
| GBP2    | SPINK7    |
| GDA     | SPRR3     |
| GPX3    | TGM5      |
| H19     | XKRX      |
| IL1F10  | ZNF662    |

**A**

## Immunofluorescence of YAP1

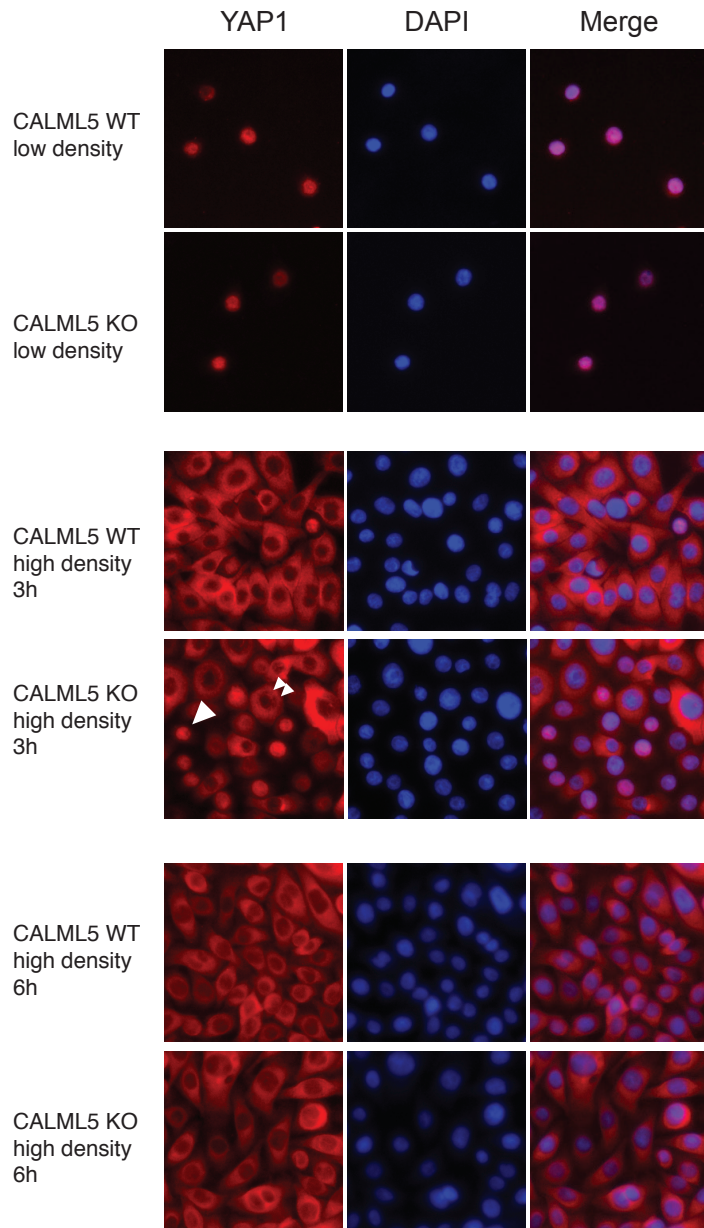**B**

## Quantitation of YAP1 subcellular localization

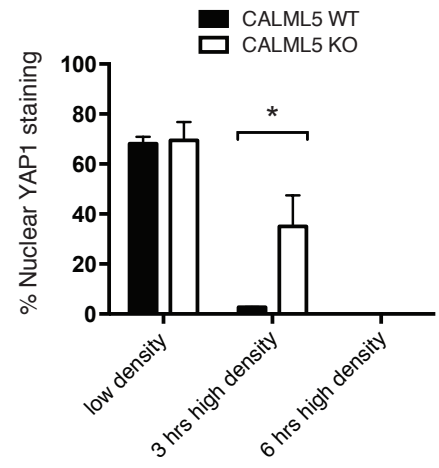**C**

## SFN BioID/MS in differentiated keratinocytes

| Gene    | Spectral Counts |     |              |
|---------|-----------------|-----|--------------|
|         | CTRL            | SFN | SFN shCALML5 |
| CSNK1A1 | 0               | 56  | 40           |
| PHLDB2  | 0               | 27  | 80           |
| PKP3    | 0               | 14  | 21           |
| ZFP36L1 | 0               | 14  | 28           |
| FABP5   | 0               | 14  | 3            |
| EXPH5   | 0               | 12  | 6            |
| ISCU    | 0               | 12  | 13           |
| BAIAP2  | 0               | 11  | 32           |
| ALDH1A3 | 0               | 11  | 0            |

**D**

## SFN BioID/IP

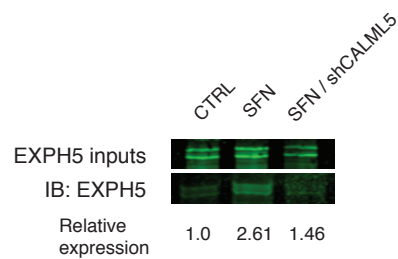

Supplement: supp_29.21.2225_SunSuppFigs1-5.pdf [file supp_29.21.2225_SunSuppFigs1-5.pdf]
